# Supplementary material for: A phenothiazine and semi-cyanine based colorimetric and fluorescent probe for the rapid detection of hypochlorous acid
Source: Royal Society of Chemistry journal article supplement (doi:10.1039/d4nj00831f), 2024-01-01

*Electronic supplementary information for*

**Phenothiazine and semi-cyanine based colorimetric and fluorescent probe for the rapid detection of hypochlorous acid**

Zhong-Chao Lin and Xue-Fei Wang\*

Department of Biological Science and Biotechnology, School of Chemical Engineering and Life Sciences, Wuhan University of Technology, Wuhan, 430070, China.

\*Corresponding author: Xue-Fei Wang.

E-mail address: xuefei@whut.edu.cn.

**Contents**

|                                                                                |    |
|--------------------------------------------------------------------------------|----|
| 1. Properties of reported probes .....                                         | 2  |
| 2. Preparation of various other analysts .....                                 | 8  |
| 3. UV/Vis absorption and fluorescence spectra of the XL and XLO .....          | 9  |
| 4. Measurement of the detection limit .....                                    | 10 |
| 5. Selectivity of probe XL .....                                               | 11 |
| 6. High-resolution mass spectra for the reaction mixture of XL with HClO ..... | 12 |
| 7. DFT calculations for ICT process .....                                      | 13 |
| 8. Test strips for the detection of HClO .....                                 | 14 |
| 9. pH effect .....                                                             | 15 |
| 10. MTT assay of HeLa cells in the presence of XL .....                        | 16 |
| 11. Zebrafish imaging layer sweep images .....                                 | 17 |
| 12. NMR spectra of related compounds .....                                     | 18 |

## 1. Properties of reported probes

**Table S1.** Summary of the relevant properties of reported probes

| Probe                                                                               | Solvent                              | Sensing mode | LOD     | Time (equiv.)             | Application                                        | Ref. |
|-------------------------------------------------------------------------------------|--------------------------------------|--------------|---------|---------------------------|----------------------------------------------------|------|
| 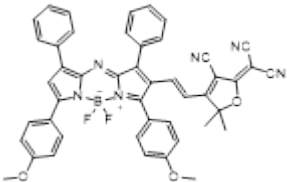   | PBS/CH <sub>3</sub> CN (1/4, v/v)    | OFF-ON       | 0.36 μM | 2 min (30 equiv.)         | RAW264.7 cells                                     | 14   |
|    | PBS buffer (pH 7.4)                  | OFF-ON       | 2.8 nM  | <5 s (12 equiv.)          | HeLa cells and Zebrafish                           | 15   |
|    | EtOH/PBS buffer (pH 7.4, 1:9, v/v)   | OFF-ON       | 89.7 nM | within 5 s (1 equiv.)     | MCF-7 cells                                        | 16   |
|   | THF/PBS buffer (v/v = 5/5, pH = 7.4) | Ratiometric  | 13.2 nM | within 0.5 min (2 equiv.) | Test strips, real water samples and RAW264.7 cells | 17   |
|  | PBS buffer (1% DMSO, pH = 7.4)       | ON-OFF       | 28.3 nM | <60 s (8 equiv.)          | RAW264.7 cells, tissues of rats, arthritis rat     | 18   |

|                                                                                    |                                         |        |                        |                         |                                                   |    |
|------------------------------------------------------------------------------------|-----------------------------------------|--------|------------------------|-------------------------|---------------------------------------------------|----|
| 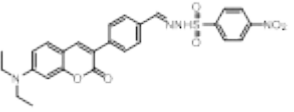  | PBS buffer (pH 7.4, containing 5% EtOH) | OFF-ON | 2.89 $\mu\text{mol/L}$ | 20 s (10.0 equiv.)      | HeLa cells, RAW264.7 cells, tissues and Zebrafish | 19 |
|   | EtOH-PBS solution (v/v = 6:4, pH = 7.4) | OFF-ON | 0.27 $\mu\text{M}$     | 5 min (12 equiv.)       | Tap water and HeLa cells                          | 20 |
|   | PBS buffer (pH = 7.4)                   | ON-OFF | 667 pM                 | -- <sup>a</sup>         | Zebrafish                                         | 21 |
|   | EtOH/PBS (6:4, v/v, pH = 7.4)           | OFF-ON | 11.51 nM               | $\leq 2$ s (200 equiv.) | HeLa cells and mice                               | 22 |
|  | 10 mM PBS containing 33% acetonitrile   | OFF-ON | 1.3 nM                 | 100 s (1.6 equiv.)      | BV-2 cells and mice                               | 23 |

|                                                                                    |                                      |        |              |                           |                                     |    |
|------------------------------------------------------------------------------------|--------------------------------------|--------|--------------|---------------------------|-------------------------------------|----|
| 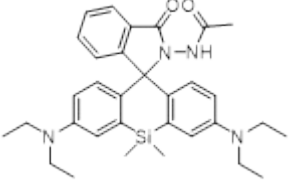  | aqueous solution                     | OFF-ON | 0.23 $\mu$ M | 35 s (5 equiv.)           | HeLa cells, RAW264.7 cells and mice | 24 |
|   | PBS solution (pH = 5.0)              | OFF-ON | 16 nM        | Rapid response (1 equiv.) | cells                               | 25 |
|  | EtOH/PBS solution (v/v, 1/9, pH 7.4) | OFF-ON | 147 nM       | 1 min (10 equiv.)         | HepG2 and liver tissues             | 26 |

|                                                                                     |                                                             |             |            |                          |                                                          |    |
|-------------------------------------------------------------------------------------|-------------------------------------------------------------|-------------|------------|--------------------------|----------------------------------------------------------|----|
| 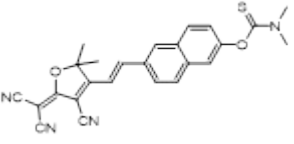   | ethanol-PBS buffer<br>(1/99, V/V, pH 7.4)                   | OFF-ON      | 24 nM      | < 1 min (--)             | HeLa cells, real water samples,<br>cellular organization | 27 |
|    | Tris-HCl buffer solution<br>(pH 7.4, containing 1%<br>DMSO) | OFF-ON      | 35.2 nM    | 40 s (20 equiv.)         | HeLa cells, Zebrafish                                    | 28 |
|    | --                                                          | Ratiometric | --         | 3 min (4 equiv.)         | HeLa cell, tissue                                        | 29 |
|    | PBS buffer (pH 7.4, 2%<br>DMSO)                             | Ratiometric | 0.14 μM    | Within 10 s (1.4 equiv.) | HeLa cell, paper                                         | 30 |
|    | CH3CN/PBS (10 mM,<br>pH = 7.4, v/v, 3:7)                    | Ratiometric | 11.8 nM    | 5 min (40 equiv.)        | MCF-7 cells                                              | 31 |
|  | -- <sup>a</sup>                                             | OFF-ON      | 147 nmol/L | few seconds (5 equiv.)   | RAW 264.7 cells; nude mice                               | 32 |
|  | PBS (pH 7.6)                                                | ON-OFF      | 5.2 nM     | 10 s (1 equiv.)          | RAW 264.7 cells                                          | 33 |

|                                                                                    |                                                                      |               |                |                            |                              |           |
|------------------------------------------------------------------------------------|----------------------------------------------------------------------|---------------|----------------|----------------------------|------------------------------|-----------|
| 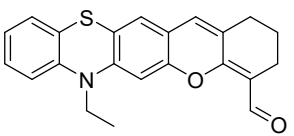  | <p>pH = 7.0, PBS/EtOH =<br/>7:3, v/v</p>                             | <p>OFF-ON</p> | <p>6 nM</p>    | <p>&lt;10 s (1 equiv.)</p> | <p>HeLa cells</p>            | <p>34</p> |
|   | <p>PBS buffer (PBS/<br/>DMF, 9:1, v/v, 10 mM,<br/>pH 7.4, 37 °C)</p> | <p>OFF-ON</p> | <p>0.32 μM</p> | <p>2 s (4 equiv.)</p>      | <p>H460 cells; mice</p>      | <p>35</p> |
|  | <p>PBS buffer (10 mM, pH<br/>7.4)</p>                                | <p>OFF-ON</p> | <p>13.3 nM</p> | <p>within 8 s (--)</p>     | <p>HeLa cells, Zebrafish</p> | <p>36</p> |

|                                                                                   |                                                                |                    |               |                                 |                                                                  |                  |
|-----------------------------------------------------------------------------------|----------------------------------------------------------------|--------------------|---------------|---------------------------------|------------------------------------------------------------------|------------------|
| 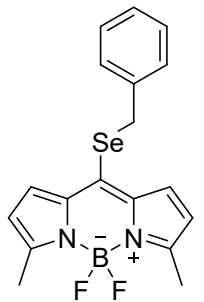 | <p>PBS buffer (pH = 7.4,<br/>20 mM, 0.1% CH<sub>3</sub>CN)</p> | <p>OFF-ON</p>      | <p>0.8 nM</p> | <p>5 s (1 equiv.)</p>           | <p>RAW 264.7 cells</p>                                           | <p>37</p>        |
|  | <p>PBS/CH<sub>3</sub>CN (v/v, 9/1,<br/>10 mM PBS, pH 7.4)</p>  | <p>Ratiometric</p> | <p>3.6 μM</p> | <p>within 1 min (30 equiv.)</p> | <p>Raw 264.7 cells, rat hippocampal<br/>slices</p>               | <p>38</p>        |
|  | <p>PBS/CH<sub>3</sub>CN (v/v, 9/1,<br/>10 mM PBS, pH 7.4)</p>  | <p>OFF-ON</p>      | <p>28 nM</p>  | <p>within 10 s (2 equiv.)</p>   | <p>Test strips, real water samples<br/>HeLa cells, Zebrafish</p> | <p>This work</p> |

<sup>a</sup>Not mentioned (--)

## 2. Preparation of various other analysts

The various ROS/RNS and other analytes were prepared as follows:

(a)  $\text{ClO}^-$  ( $\text{NaClO}$ ),  $\text{H}_2\text{O}_2$  and TBHP (tert-butyl hydroperoxide) were purchased from the company, and then diluted with deionized water to use.

(b)  $\text{O}_2^{\bullet-}$ :  $\text{KO}_2$  was dissolved in dry DMSO to make the 1 mM stock solution;

(c)  $\bullet\text{OH}$ :  $\text{FeSO}_4$  solution (1.0 mM, 0.1 mL) was added to a solution of  $\text{H}_2\text{O}_2$  (1.0 mM, 1.0 mL) in PBS (10 mM, pH 7.4) to give a 0.1 mM stock solution at room temperature;

(d)  $\text{ONOO}^-$ : A stirred solution of  $\text{NaNO}_2$  (0.6 M, 10 mL) and  $\text{H}_2\text{O}_2$  (0.7 M, 10 mL) in deionized water was added to  $\text{HCl}$  (0.6 M, 10 mL) at 0 °C, followed immediately by a rapid addition of  $\text{NaOH}$  (1.5 M, 20 mL). Excess hydrogen peroxide was removed by  $\text{MnO}_2$ . The concentration of  $\text{ONOO}^-$  was determined by UV analysis with an extinction coefficient of 302 nm ( $\epsilon = 1670 \text{ M}^{-1} \text{ cm}^{-1}$ ), and the solution was stored at -20 °C for use;

(e)  $^1\text{O}_2$ :  $\text{NaMoO}_4$  solution (10 mM) and  $\text{H}_2\text{O}_2$  solution (10 mM) were prepared with PBS (10 mM, pH=7.4), and an aliquot of these two solutions was mixed to obtain a 5 mM of  $^1\text{O}_2$  stock solution;

(f)  $\text{NO}$ :  $\text{H}_2\text{SO}_4$  solution (3.6 M) was added dropwise to a stirred  $\text{NaNO}_2$  solution (7.3 M). The resulting gas was passed through a solution of  $\text{NaOH}$  (2 M) and then deionized water to give a 2.0 mM stock solution.

Other analysts were purchased from commercial suppliers and used directly.



### 3. UV/Vis absorption and fluorescence spectra of the XL and XLO

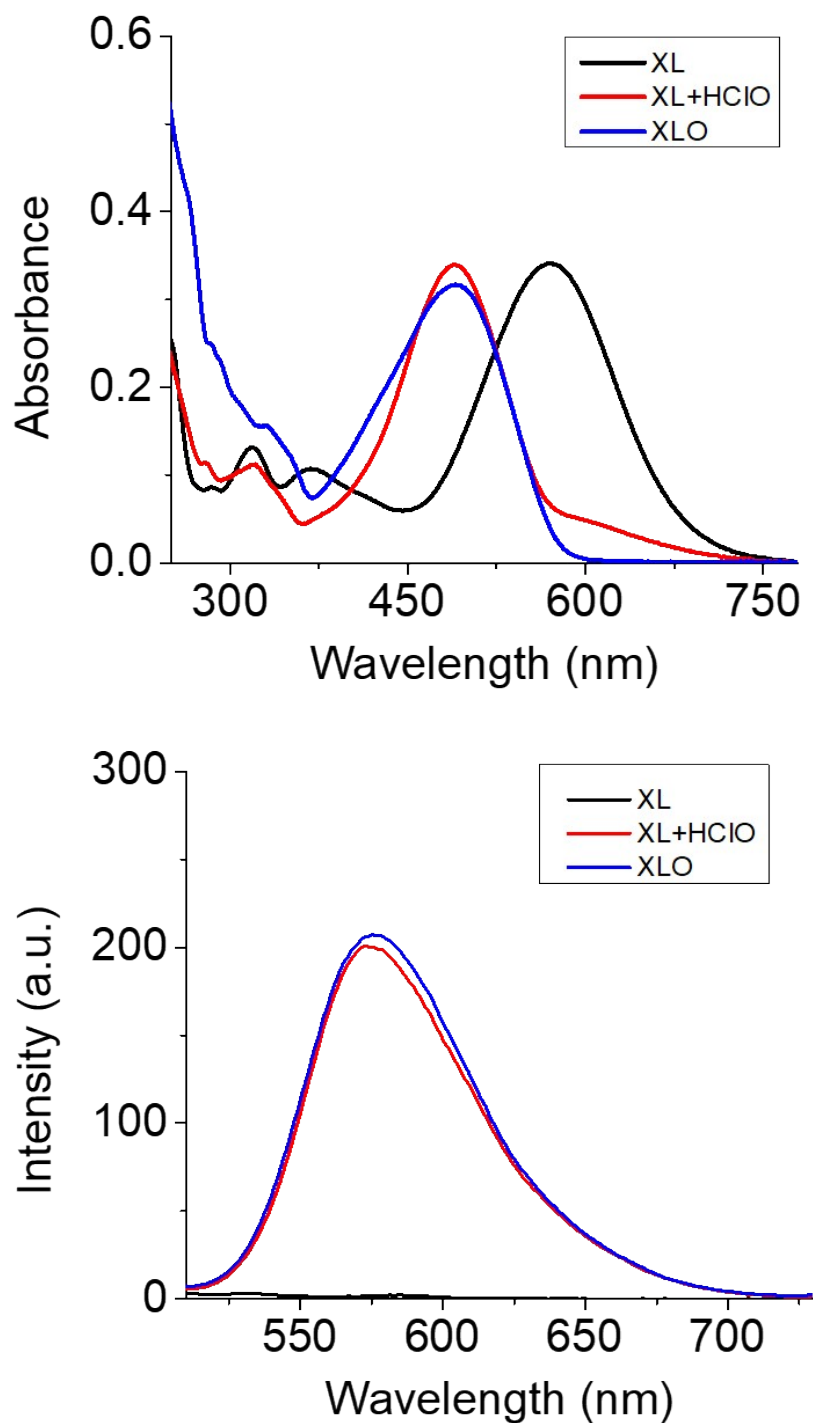

**Figure S1.** UV/vis absorption (upper) and fluorescence spectra (bottom) of XL, XLO, and 10  $\mu\text{M}$  XL with 15  $\mu\text{M}$  HClO in PBS (10%  $\text{CH}_3\text{CN}$  containing,  $\text{pH}=7.4$ ), excitation at 488 nm.

#### 4. Measurement of the detection limit

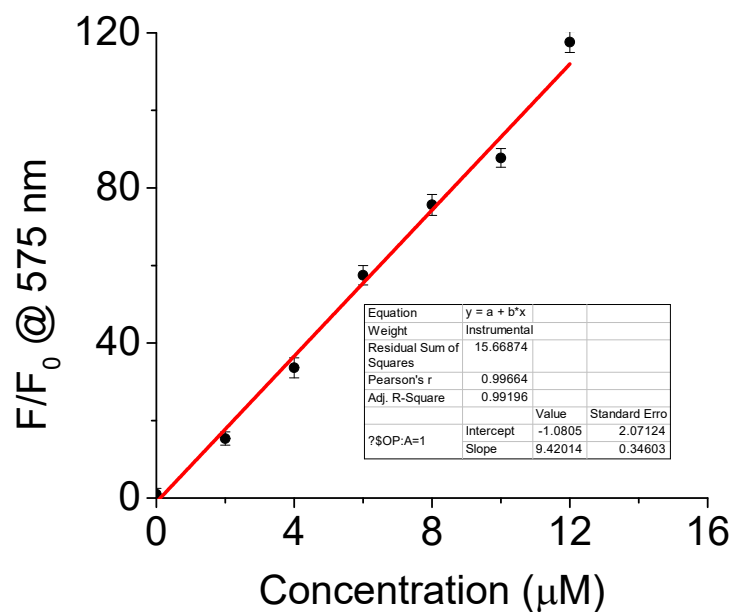

**Figure S2.** Linear correlation between the fluorescence increment ( $F/F_0$ ) of XL at 575 nm and the concentration of HClO.

The detection limit was calculated based on the fluorescence titration:

The fluorescence intensity at 575 nm was fitted linearly with the increasing concentrations of HClO over a range of 0-20  $\mu\text{M}$ . From the plot, the slope ( $k$ ) was obtained to be  $9.4 \mu\text{M}^{-1}$ , shown in Figure S2. The detection limit of XL to HClO was calculated to be 28 nM in term of the formula  $(3\sigma/k)$ , where  $\sigma$  is the standard deviation of blank measurement.

## 5. Selectivity of probe XL

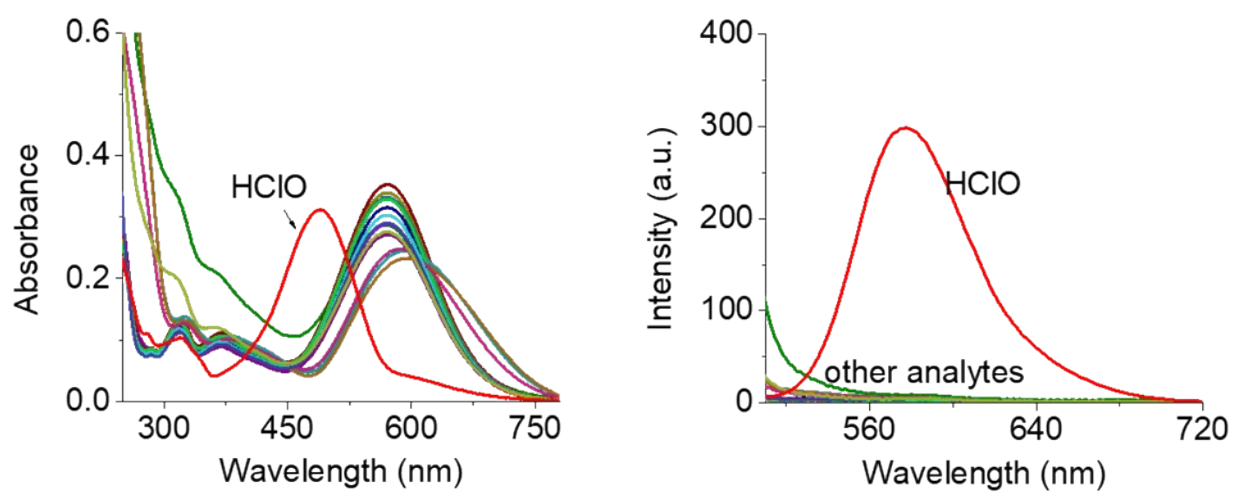

**Figure S3.** UV/vis absorption (left) and fluorescence (right) spectra of probes with various analytes.

(Analytes: 0, blank; 1,  $\text{Na}^+$ ; 2,  $\text{K}^+$ ; 3,  $\text{Cu}^{2+}$ ; 4,  $\text{Zn}^{2+}$ ; 5,  $\text{Cl}^-$ ; 6,  $\text{I}^-$ ; 7,  $\text{SO}_4^{2-}$ ; 8, Cys; 9, Hcy; 10, GSH;

11,  $\text{H}_2\text{O}_2$ ; 12, TBHP; 13,  $\text{O}_2^{\cdot-}$ ; 14,  $\cdot\text{OH}$ ; 15,  $\text{ONOO}^-$ ; 16,  $^1\text{O}_2$ ; 17, NO; 18,  $\text{ClO}^-$ )

## 6. High-resolution mass spectra for the reaction mixture of XL with HClO

202312019HESI+LK-94 #32 RT: 0.47 AV: 1 NL: 2.12E7  
T: FTMS + c ESI Full ms [100.00-600.00]

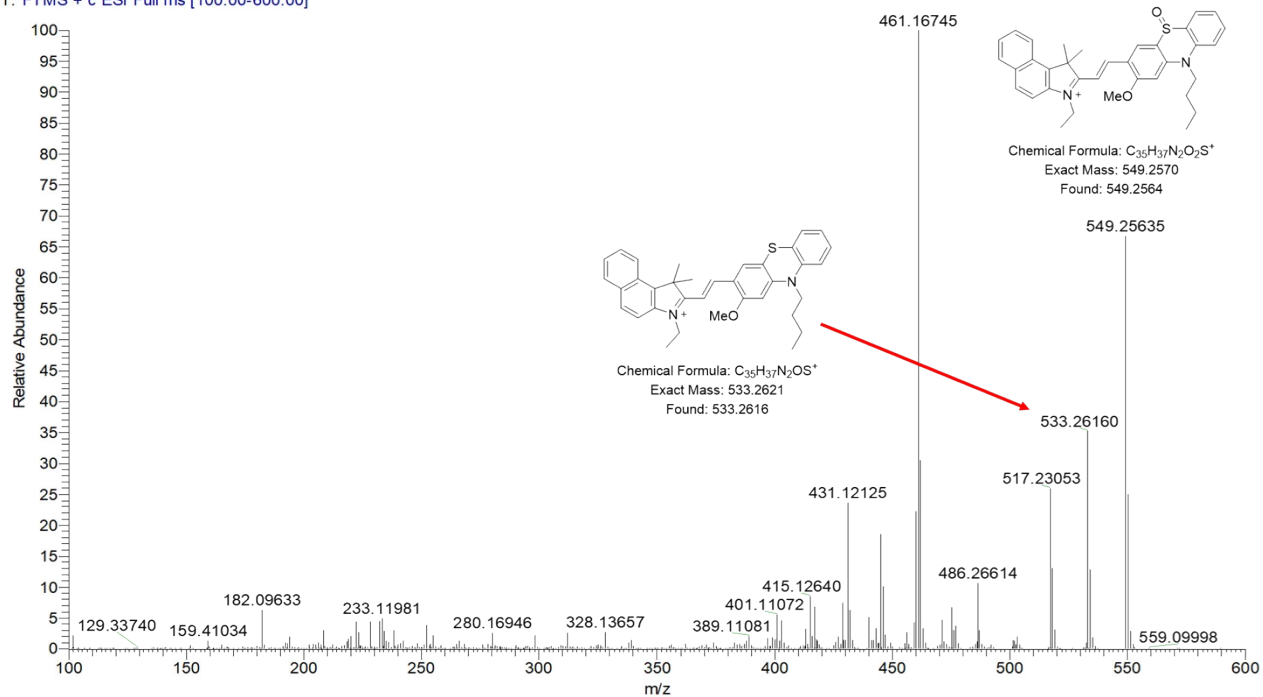

Figure S4. High-resolution mass spectrum for the mixture of XL with HClO.

## 7. DFT calculations for ICT process

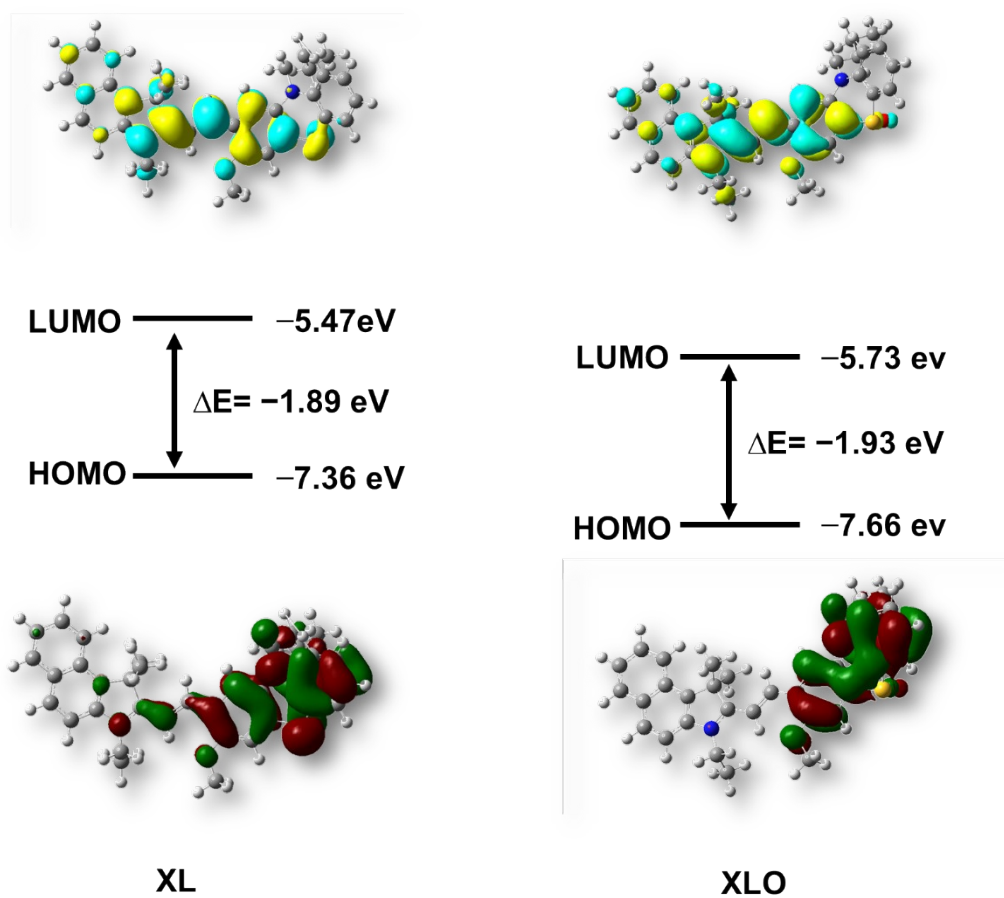

Figure S5. HOMO-LUMO energy level of the probe XL and product XLO.

## 8. Test strips for the detection of HClO

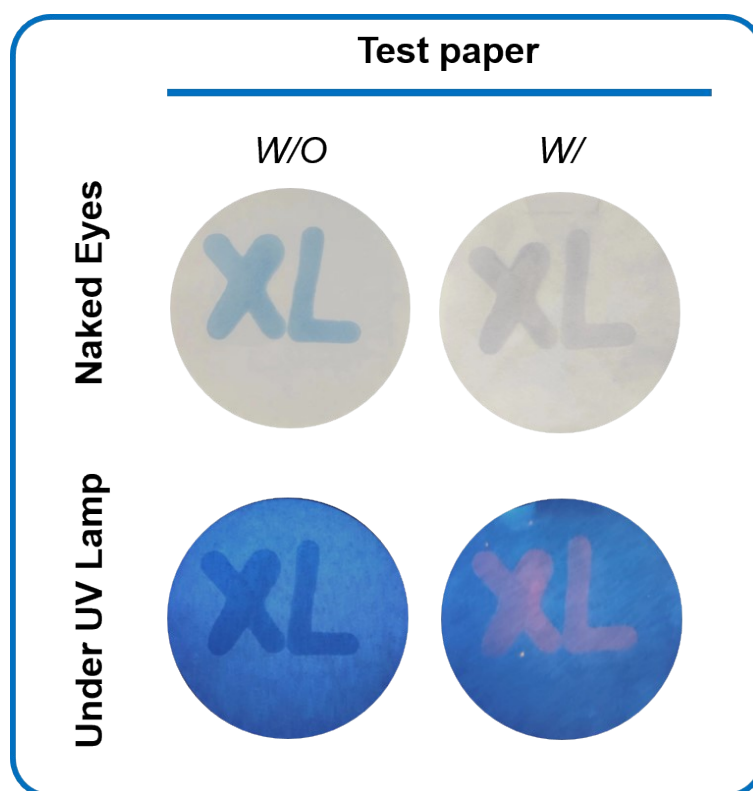

**Figure S6.** Photographs of test strips containing probe XL before (W/O) and after (W/) the treatment with HClO under naked eye observation (upper) or portable UV lamp irradiation at 365 nm (bottom).

## 9. pH effect

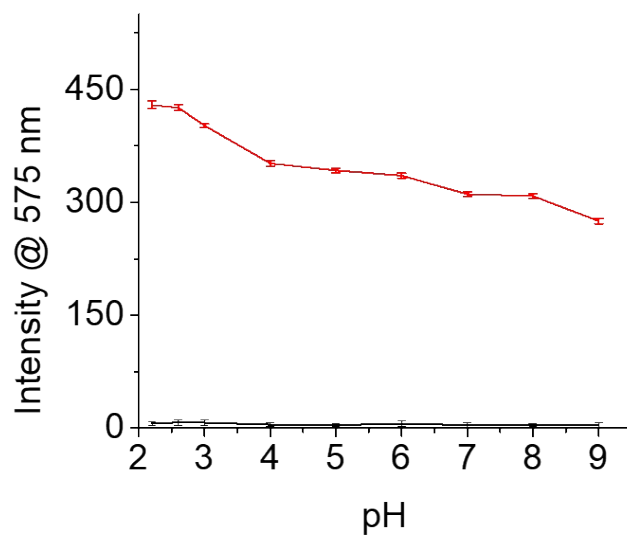

**Figure S7.** Fluorescence intensity at 575 nm of probe XL before (black) and after (red) the reaction with HClO at different pH.

## 10. MTT assay of HeLa cells in the presence of XL

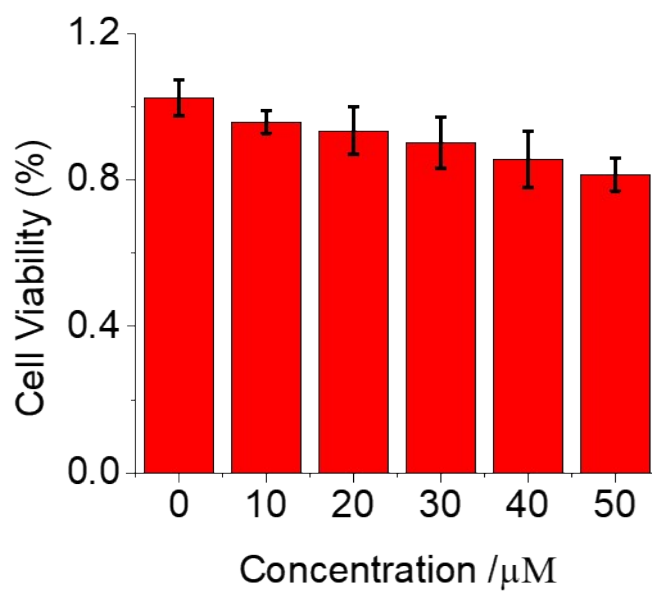

**Figure S8.** Cytotoxicity assay of probe XL for HeLa cells at different concentrations for 24 h.



## 11. Zebrafish imaging layer sweep images

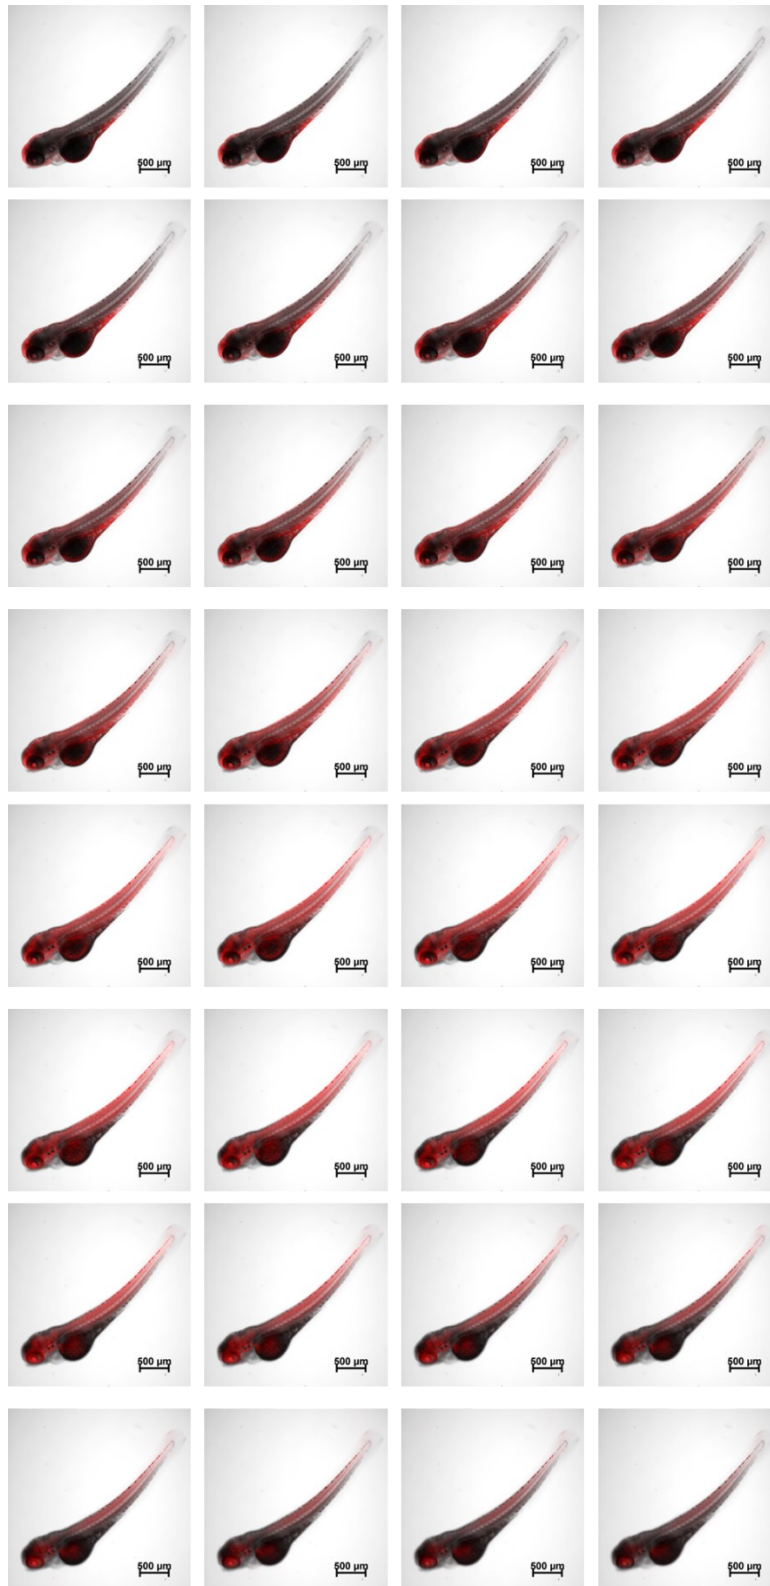

**Figure S9.** The z-axis swept images at different depths.

## 12. NMR spectra of related compounds

$^1\text{H}$  NMR of compound **3** in  $\text{CDCl}_3$ , 400 MHz.

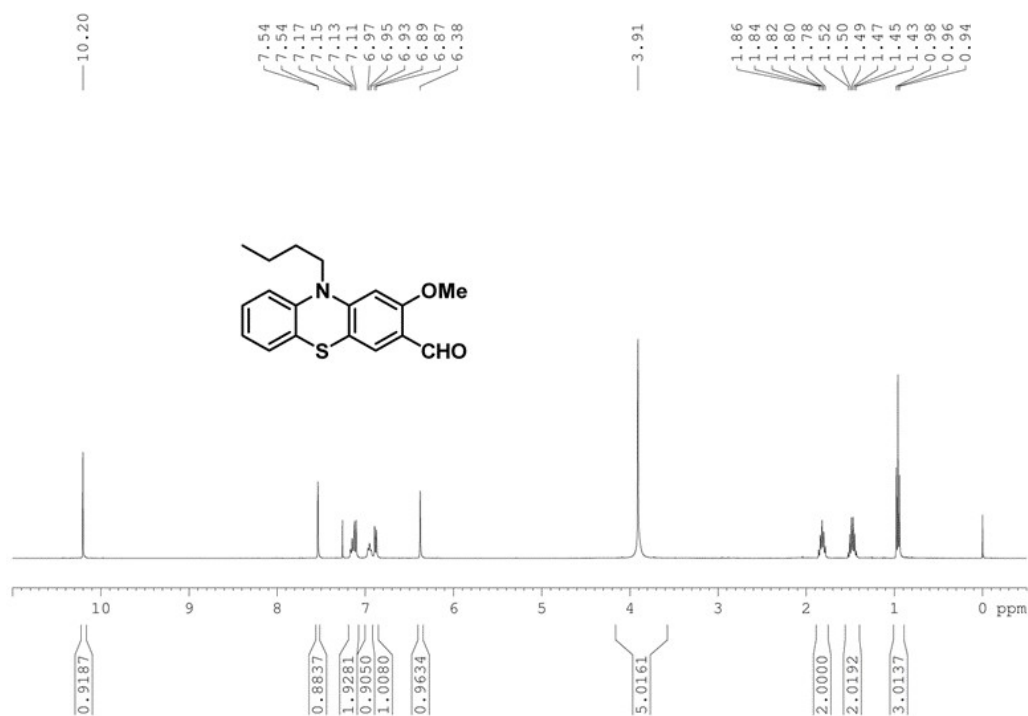

$^1\text{H}$  NMR of compound **4** in  $\text{CDCl}_3$ , 400 MHz.

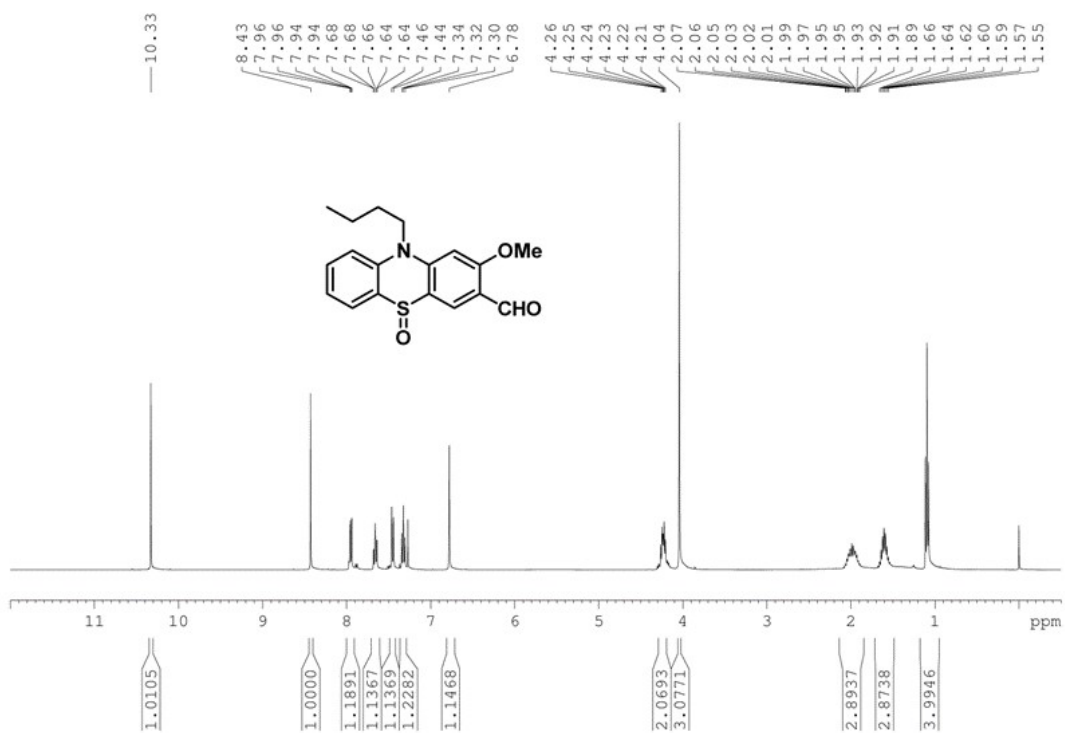

$^{13}\text{C}$  NMR of compound **4** in  $\text{CDCl}_3$ , 400 MHz.

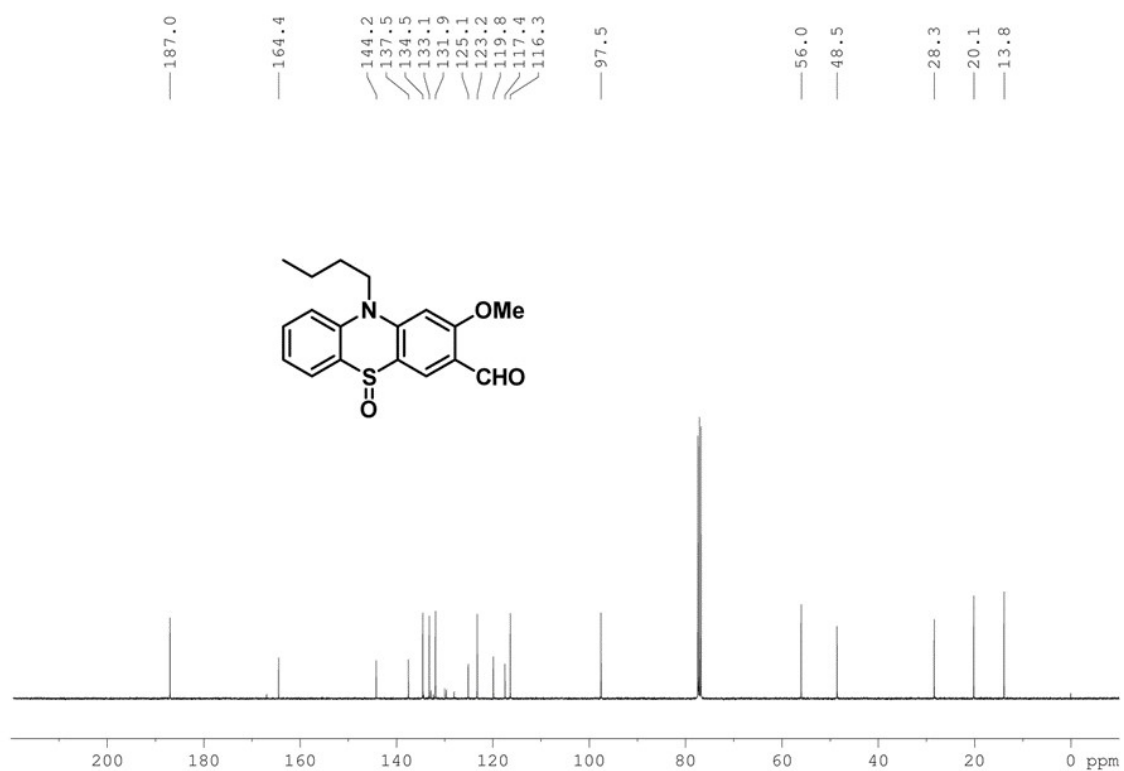

$^1\text{H}$  NMR of Compound **5** in  $\text{CDCl}_3$ , 400 MHz.

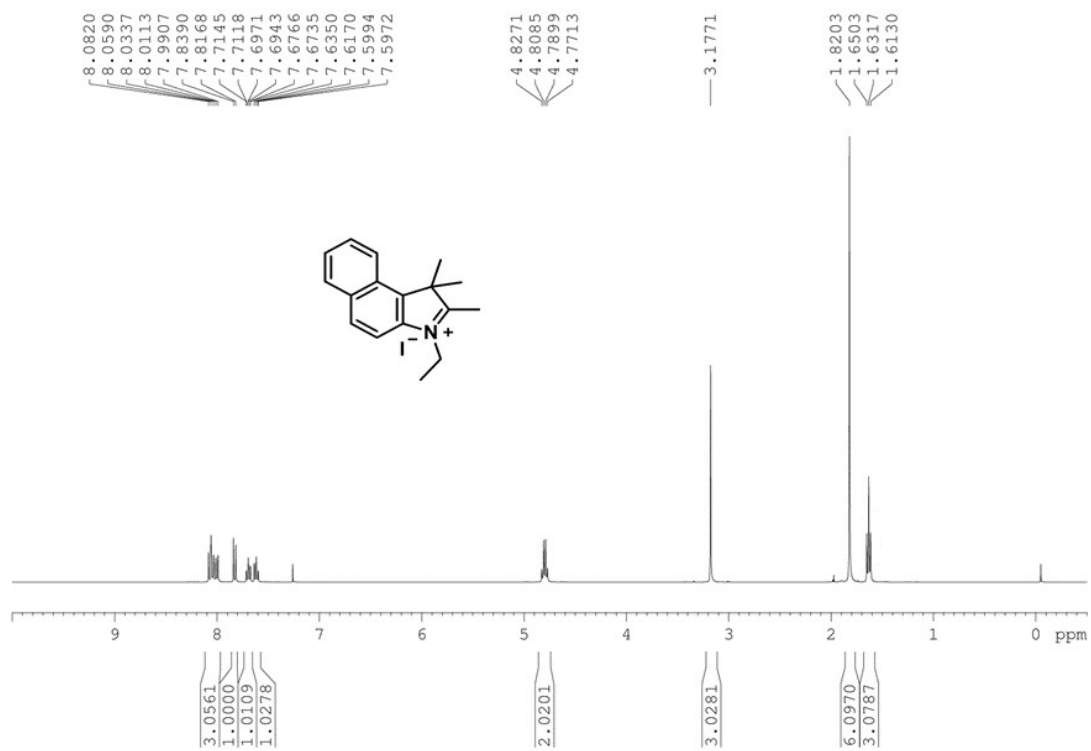

$^1\text{H}$  NMR of XL in  $\text{CDCl}_3$ , 400 MHz.

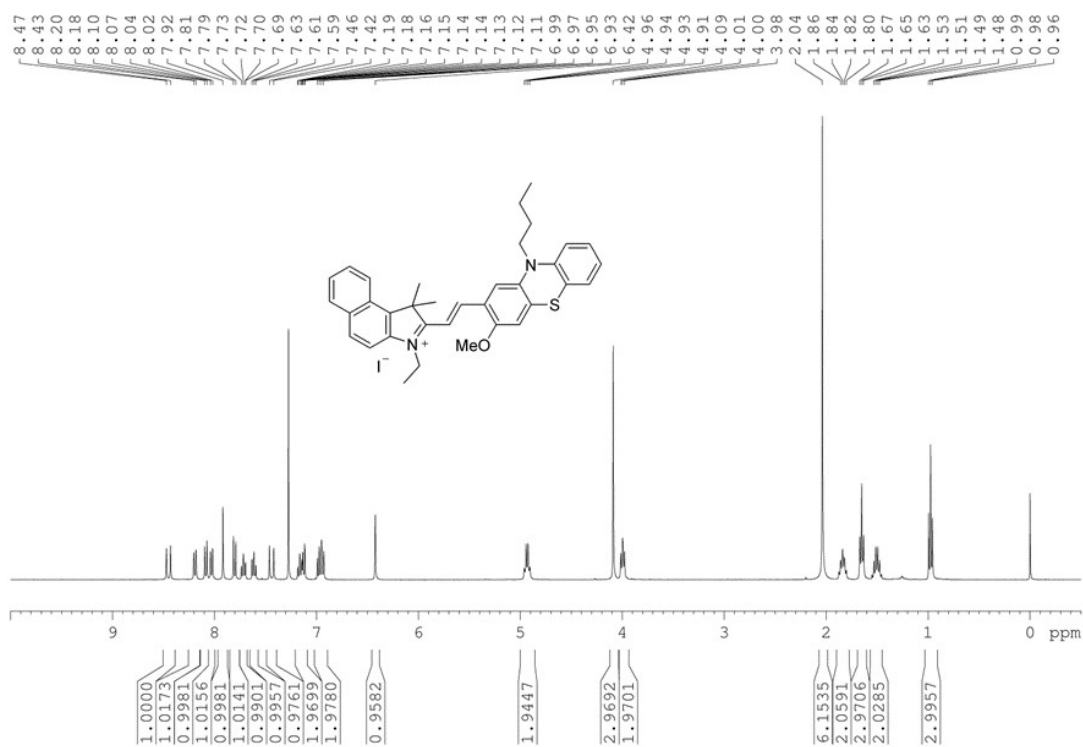

$^{13}\text{C}$  NMR of XL in  $\text{CDCl}_3$ , 100 MHz.

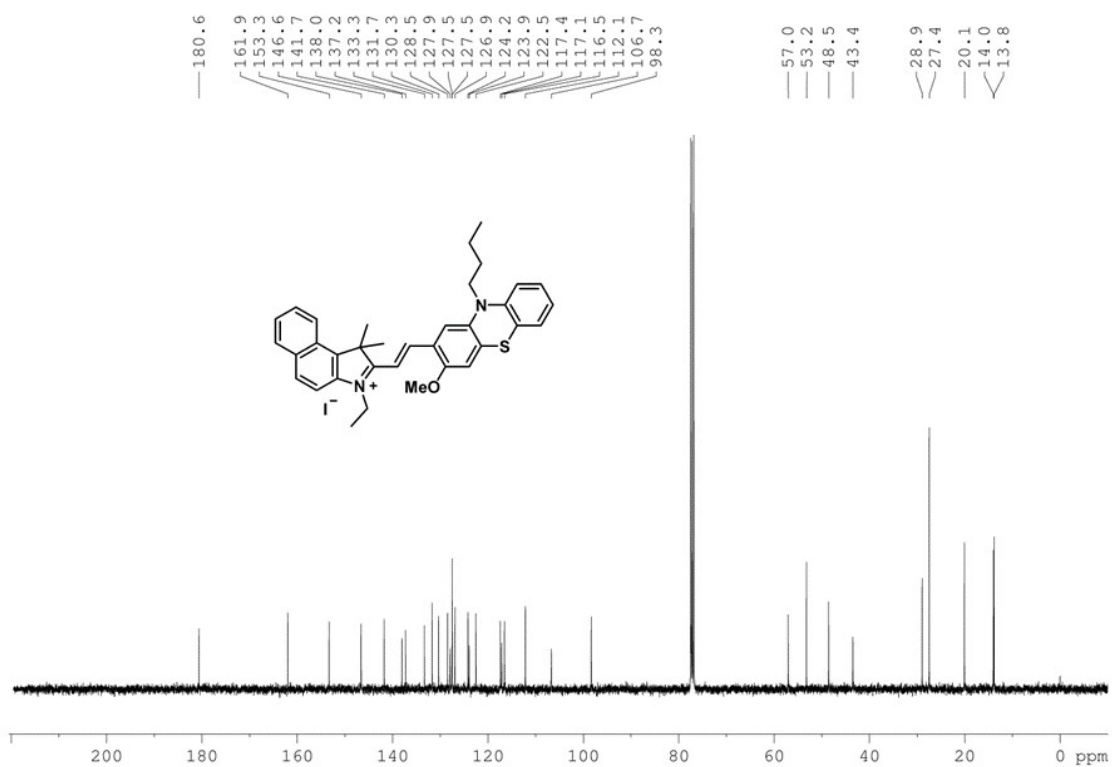

$^1\text{H}$  NMR of XLO in  $\text{CDCl}_3$ , 400 MHz.

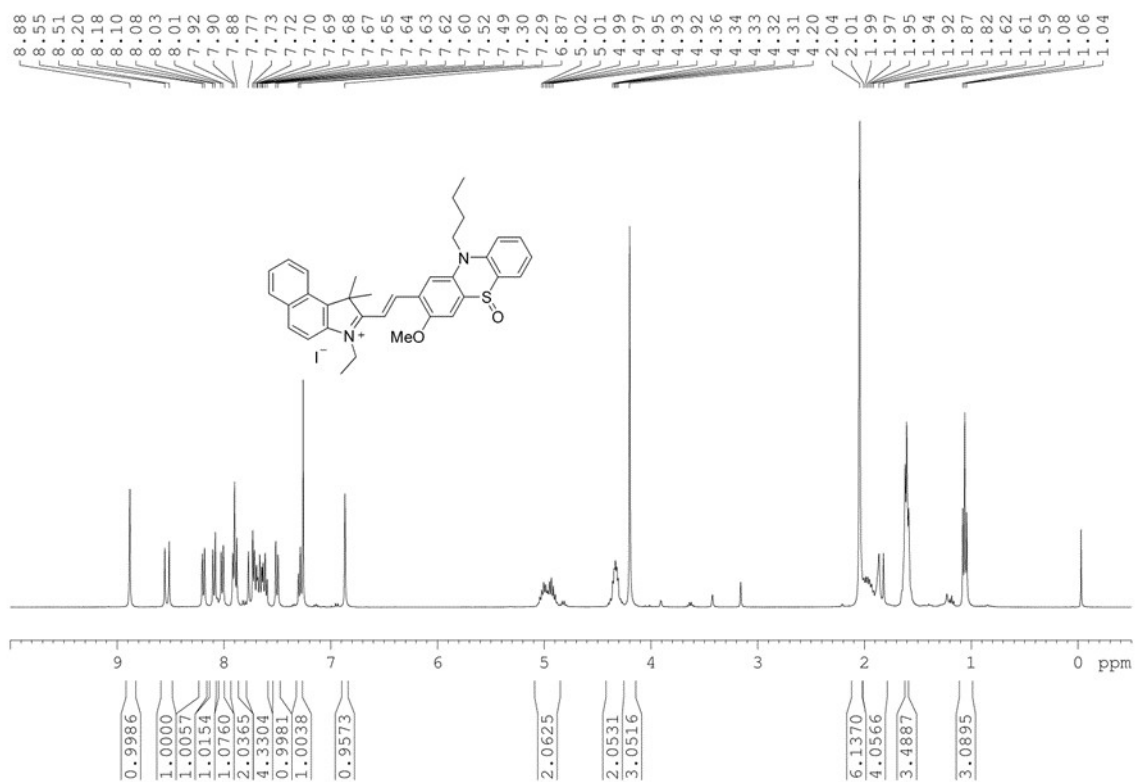

$^{13}\text{C}$  NMR of XLO in  $\text{CDCl}_3$ , 100 MHz.

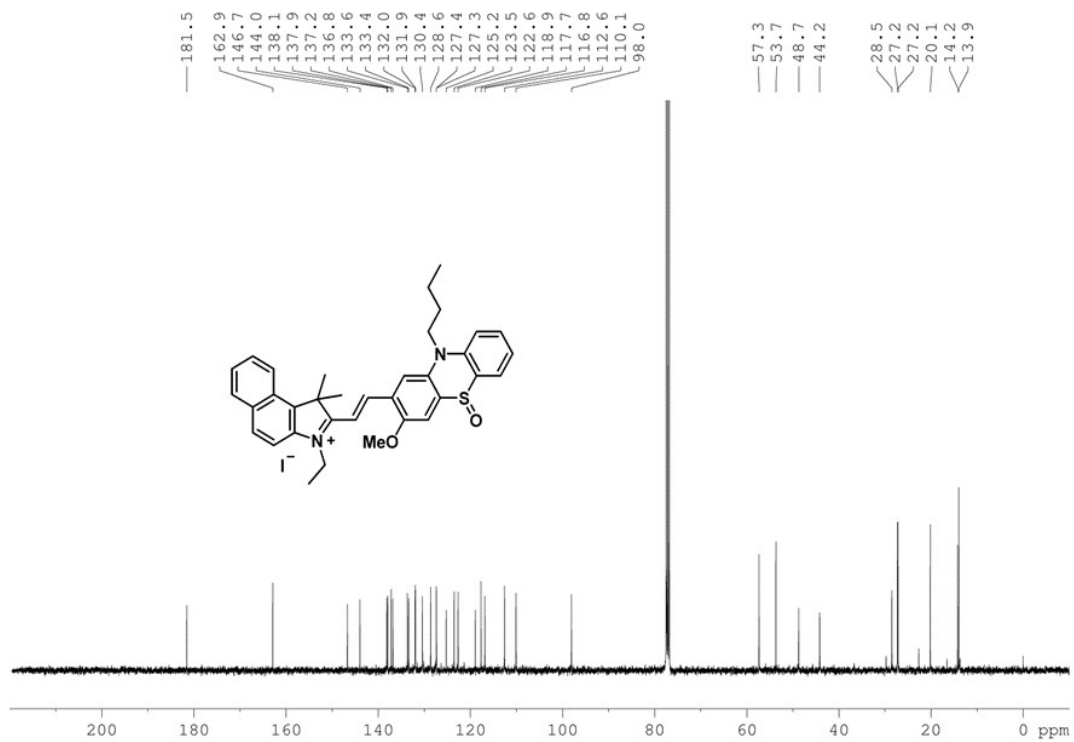

Supplement: d4nj00831f1.pdf [file d4nj00831f1.pdf]
